# Supplementary material
Source: MDPI journal article supplement (https://www.mdpi.com/1999-4907/8/7/226)
Supplement: s1 [file s1]

## Sheet: Table S1
Table S1. Tree-level data for gynoecious Ailanthus included in the study
ID	Previous IDs	Experiment	Date collected	State	Location details	Environment	No. stems @ dbh	dbh (cm)	Total seeds produced	Age
PA-01	N/A	Seed production	8.27.11	PA	522 S immediately below Lewistown	roadside	1	7.6	594.218	5
PA-02	N/A	Seed production	8.27.11	PA	522 S near FS01	roadside	3	6.3	24214.4	6
" "	"	" "	" "	"	" "	" "		6.3	" "	"
" "	"	" "	" "	"	" "	" "		6.5	" "	"
PA-03	N/A	Seed production	8.27.11	PA	322 E Port Royal exit ramp	roadside	1	7.3	2387.71	4
PA-04	N/A	Seed production	8.27.11	PA	Dauphin Park and Ride	roadside	1	5.5	618.516	9
PA-05	N/A	Seed production	8.27.11	PA	322 W Thompsontown Exit ramp	roadside	2	5.3	28135.7	6
" "	"	" "	" "	"	" "	" "		4.6	" "	"
PA-06	N/A	Seed production	8.27.11	PA	322 W between Millerstown and Pfoutz Valley Exit	Roadside on shale cliff	1	2.1	1936.08	7
PA-07	N/A	Seed production	8.27.11	PA	Immediately adjacent to FS06	Roadside on shale cliff	1	2.4	134.8	5
PA-08	N/A	Seed production	8.27.11	PA	322 W between Millerstown and Pfoutz Valley Exit	Roadside on shale cliff	1	3	3355.65	9
PA-09	N/A	Seed production	8.27.11	PA	322 W beforeThompsontown Exit	Roadside	1	4	6438.46	5
PA-11	N/A	Seed production	8.27.11	PA	Immediately adjacent to FS10	Roadside on shale cliff	3	3.3	8175.39	8
" "	"	" "	" "	"	" "	" "		3.3	" "	"
" "	"	" "	" "	"	" "	" "		3.1	" "	"
PA-12	N/A	Seed production	9.01.11	PA	99 S north of Exit 33	roadside	2	3.1	1066.78	10
" "	"	" "	" "	"	" "	" "		2.5	" "	"
PA-13	N/A	Seed production	9.01.11	PA	99 S north of Exit 33	roadside	2	7.2	33751.3	17
" "	"	" "	" "	"	" "	" "		5.5	" "	"
PA-14	N/A	Seed production	9.01.11	PA	Rt. 22 E west of 453 & 45 Jnct. Along road	roadside	1	3	1086.52	8
PA-15	N/A	Seed production	9.01.11	PA	Rt. 22 E west of 453 & 45 Jnct. Along road	roadside	1	4.6	6146.63	9
PA-16	N/A	Seed production	9.01.11	PA	Rt. 22 E west of 453 & 45 Jnct. Along road	roadside	1	3.5	81.8028	9
PA-17	N/A	Seed production	9.01.11	PA	Rt. 22 E west of 453 & 45 Jnct. Along road	roadside	1	4.4	3759.06	9
PA-18	N/A	Seed production	9.02.11	PA	entrance ramp 99 S Exit 31	Roadside on shale cliff	3	4.4	19879.4	11
" "	"	" "	" "	"	" "	" "		4.2	" "	"
" "	"	" "	" "	"	" "	" "		3.7	" "	"
PA-19	N/A	Seed production	9.02.11	PA	entrance ramp 99 S Exit 31	Roadside	2	2.8	180.743	9
" "	"	" "	" "	"	" "	" "		2.7	" "	"
PA-20	N/A	Seed production	9.02.11	PA	" "	Roadside	1	7.3	6138.74	10
PA-21	N/A	Seed production	9.02.11	PA	entrance ramp 99 S Exit 31	Roadside	1	4.8	10344.2	9
PA-22	N/A	Seed production	9.13.11	PA	ccsp water tower road	roadside	1	5.7	4983.75	11
PA-23	N/A	Seed production	9.22.11	PA	SGL1 n.t. Ev symbiont study	forest	1	40.6	4441.36	41
PA-24	N/A	Seed production	8.8.12	PA	PSU UP tree	campus	1	115.06	685641	112
PA-25	N/A	Seed production	9.24.11	PA	E. of Arch rock, 322 East bound before herb trt	roadside	1	5	12208.9	5
PA-26	N/A	Seed production	9.24.11	PA	E. of Arch rock, 322 East bound before herb trt	roadside	1	10.2	24692	10
PA-27	N/A	Seed production	9.24.11	PA	E. of Arch rock, 322 East bound close to herb trt	roadside	1	7.7	14722.1	7
PA-28	N/A	Seed production	9.24.11	PA	322 E., btwn Port Royal and Thompsontown Exit	median, roadside	3	3	20644.8	10
" "	"	" "	" "	"	" "	" "		2.4	" "	"
" "	"	" "	" "	"	" "	" "		1.8	" "	"
PA-29	N/A	Seed production	9.24.11	PA	322 E., btwn Port Royal and Thompsontown Exit	median, roadside	1	2	2009.42	15
PA-30	N/A	Seed production	9.24.11	PA	322 E., btwn Port Royal and Thompsontown Exit	roadside	1	13.8	108278	8
PA-31	N/A	Seed production	9.24.11	PA	322 W., btwn Port Royal and Thompsontown Exit	roadside	1	3.4	426.357	9
PA-32	N/A	Seed production	9.24.11	PA	322 W., btwn Port Royal and Thompsontown Exit	roadside	1	2.5	176.118	10
PA-33	N/A	Seed production	9.24.11	PA	322 E., btwn Arch Rock and Mifflintown Exit	cliff	2	4	2703.15	12
" "	"	" "	" "	"	" "	" "		5.1	" "	"
PA-34	N/A	Seed production	9.24.11	PA	322 E., btwn Arch Rock and Mifflintown Exit	median, roadside	1	5.5	12462.8	13
PA-35	N/A	Seed production	7.14.12	PA	322 E., btwn Lewistown and Arch Rock Exit	roadside	1	6.5	860.825	4
PA-36	N/A	Seed production	7.14.12	PA	322 W., btwn Mifflintown and Arch Rock Exit	median, roadside	1	4.5	265.262	7
PA-37	N/A	Seed production	7.14.12	PA	322 W., btwn Mifflintown and Arch Rock Exit	median, roadside	1	3.2	166.688	7
PA-38	N/A	Seed production	7.14.12	PA	east of SGL1 by about 150ft	forest	1	14.1	3893.81	10
PA-39	N/A	Seed production	7.14.12	PA	west of SGL1, by thistle inoc	forest	1	7	40.2663	5
PA-40	N/A	Seed production	7.14.12	PA	west of SGL1, by symbiont study	forest	1	7.2	4768.71	10
PA-41	N/A	Seed production	7.14.12	PA	Dauphin, PA, rt 225 S, half mile from 322	roadside	1	5.2	2642.83	9
PA-42	N/A	Seed production	7.14.12	PA	Rt. 22 E west of 453 & 45 Jnct. Along road	roadside	1	6.5	4982.9	9
PA-43	N/A	Seed production	7.25.12	PA	Below RLK 1 near smaller field	forest	1	22.5	70848.9	46
PA-44	N/A	Seed production	7.26.12	PA	SGL211 next to a 3rd landing	forest	1	10.8	7553.85	8
PA-45	N/A	Seed production	7.26.12	PA	SGL211 in old clearcut next to road that passes SGL1	forest	1	8.2	5466.56	5
PA-46	N/A	Seed production	7.26.12	PA	SGL1 near Sumac inoc by landing	forest	1	9	6878.84	7
PA-47	N/A	Seed production	7.26.12	PA	Lewistown Exit Rt 22 Business	roadside	1	7.5	1989.25	5
PA-48	N/A	Seed production	7.26.12	PA	Lewistown Exit Rt 22 Business	roadside	1	4.6	1358.51	8
PA-49	N/A	Seed production	7.27.12	PA	RLK1 along field	forest, field edge	1	25.2	73703.4	40
PA-50	N/A	Seed production	7.27.12	PA	RLK1 along field	forest, field edge	1	13	46567.2	9
PA-51	N/A	Seed production	8.3.12	PA	Below RLK 1, near June inoc.	forest	1	47.5	68627	45
PA-52	N/A	Seed production	8.3.12	PA	RLK1, near Sept. inoc	forest	1	15	22486.8	21
PA-53	N/A	Seed production	8.3.12	PA	RLK1, near Sept. inoc	forest	1	25.3	142502	46
PA-54	N/A	Seed production	8.3.12	PA	RLK1 near Soil form. Inoc	forest	1	20.7	89703.9	37
PA-55	N/A	Seed production	8.3.12	PA	RLK1 near Soil form. Inoc	forest	1	25	72814.5	40
PA-56	N/A	Seed production	8.3.12	PA	RLK1 near Soil form. Inoc	forest	1	24.3	40664	34
PA-57	P30a	Seed germination	7.30.10	PA	Gettysburg	highway	n/a	n/a	n/a	n/a
PA-58	S38	Seed germination	10.09.09	PA	Buchannan State Forest, Site BSF2	forest	n/a	n/a	n/a	n/a
PA-59	S9b	Seed germination	9.04.08	PA	Monongalia County airport	roadside	n/a	n/a	n/a	n/a
PA-60	HSAa23a,b	Seed germination	9.15.08	PA	On the campus of Penn State University adjacent to Old Main	campus	n/a	n/a	n/a	98
WV-01	Mon. Co. Airport	Seed germination	8.09.17	WV	Monongalia County airport	roadside	n/a	n/a	n/a	52
WV-02	Organic Farm Tree #1	Seed germination / Tetrazolium test	8.18.17	WV	WVU Organic Farm, Tree #1	field	n/a	n/a	n/a	20
WV-03	Organic Farm Tree #2	Seed germination	8.18.17	WV	WVU Organic Farm, Tree #2	field	n/a	n/a	n/a	12
WV-04	WVU1	Seed germination	8.11.17	WV	WVU Evansdale Campus, Evansdale Drive	roadside	n/a	n/a	n/a	45
WV-05	Farmhouse	Seed germination	8.16.17	WV	Cedarstone Drive, Morgantown, WV	yard	n/a	n/a	n/a	16
PA-61	East Finley Township, PA	Seed germination / Tetrazolium test	8.31.16	PA	Rural road	roadside	n/a	n/a	n/a	7
PA-62	HSAa23a,b	Seed germination / Tetrazolium test	10.29.16	PA	On the campus of Penn State University adjacent to Old Main	campus	n/a	n/a	n/a	104
IB1	−	Seed production	−	PA	See Illick and Brouse 1926	See location details	−	30.5	995995	29c
IB2	−	Seed production	−	PA	" "	" "	−	20.3	879580	21c
FRA1	−	Seed production	−	PA	See Bory and Clair-Maczulajtys 1980	" "	−	1.2	240	4c
FRA2	−	Seed production	−	France	" "	" "	−	2.5	900	5c
FRA3	−	Seed production	−	France	" "	" "	−	16	88200	18c
FRA4	−	Seed production	−	France	" "	" "	−	11	22500	13c
FRA5	−	Seed production	−	France	" "	" "	−	25	240000	25c
FRA6	−	Seed production	−	France	" "	" "	−	21	78000	21c
FRA7	−	Seed production	−	France	" "	" "	−	11	45000	13c
FRA8	−	Seed production	−	France	" "	" "	−	17	110000	19c
FRA9	−	Seed production	−	France	" "	" "	−	11	58000	13c
FRA10	−	Seed production	−	France	" "	" "	−	9	28000	12c
FRA11	−	Seed production	−	France	" "	" "	−	17	54000	19c
FRA12	−	Seed production	−	France	" "	" "	−	19	190000	20c
FRA13	−	Seed production	−	France	" "	" "	−	30	325000	29c
FRA14	−	Seed production	−	France	" "	" "	−	16	122000	18c
FRA15	−	Seed production	−	France	" "	" "	−	11	81000	13c
FRA16	−	Seed production	−	France	" "	" "	−	18	125000	19c
FRA17	−	Seed production	−	France	" "	" "	−	12	51000	14c
FRA18	−	Seed production	−	France	" "	" "	−	5	85000	8c
FRA19	−	Seed production	−	France	" "	" "	−	6.5	36000	9c
FRA20	−	Seed production	−	France	" "	" "	−	10	14000	13c
FRA21	−	Seed production	−	France	" "	" "	−	5.5	55000	4c
a See Appendix 5 and/or Table 1 in Kasson et al. 2013 for additional information.
b See Supplemental Table 1 in Kasson et al. 2015 for additional information.
c Ages were estimated using Fig. 4 age-DBH regression.
